# Supplementary material for: Conductivity of ionic liquid-derived polymers with internal gold nanoparticle conduits
Source: Royal Society of Chemistry journal article supplement (doi:10.1039/b910059h), 2009-01-01
Supplement: b910059h.pdf [file b910059h.pdf]

Electronic Supplementary Information for:

**Conductivity of ionic liquid-derived polymers with internal gold nanoparticle conduits**

Sungwon Lee<sup>1</sup>, Matthew D. Cummins<sup>2</sup>, Gerold A. Willing<sup>2</sup>, and Millicent A. Firestone<sup>1</sup>

<sup>1</sup>Materials Science Divisions, Argonne National Laboratory, 9700 South Cass Avenue, Argonne, IL 60439, <sup>2</sup>Department of Chemical Engineering, University of Louisville, Louisville, KY

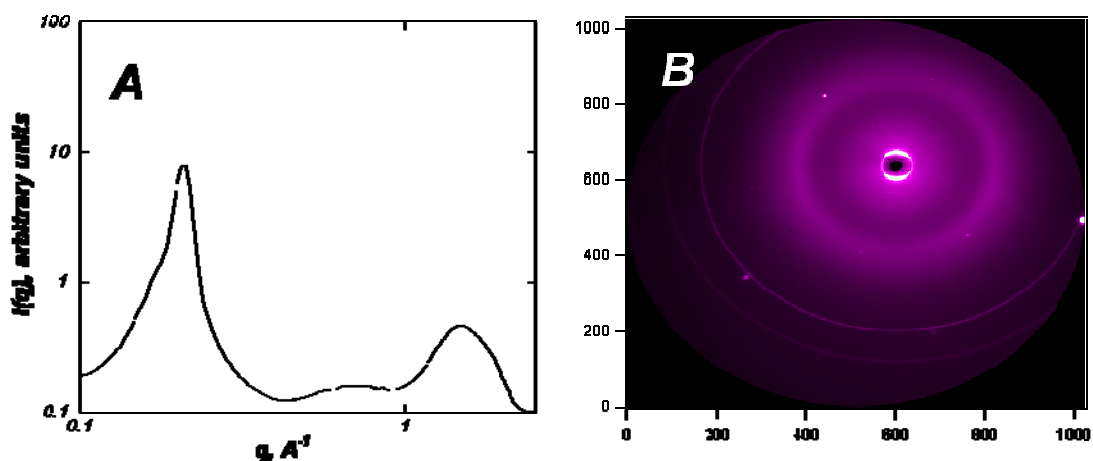

**Figure 1S.** X-ray scattering data collected on a photopolymerized binary mixture of  $[C_{10}VIm^+][Cl^-]$  with an aqueous solution of 15 % (w/w)  $AuCl_4^-$  ( $Au^{3+}$  content was 0.58  $\mu$ moles), (A) Azimuthally integrated 1-D. (B) 2-D pattern collected with the cylindrically shaped sample oriented with the long axis perpendicular to incident beam.

**Table 1S.** Fit parameters determined for EIS data in Figure 3B to the equivalent circuit represented in Figure 3A.

| [Au <sup>3+</sup> ]<br>μmoles | R (% error)                | C1 (% error)                 | CPE-T (% error)              | CPE-P (% error) |
|-------------------------------|----------------------------|------------------------------|------------------------------|-----------------|
| 0                             | 7.99x10 <sup>6</sup> (3.6) | 9.30x10 <sup>-12</sup> (3.4) | 1.06x10 <sup>-8</sup> (15.5) | 0.59 (2.9)      |
| 0.175±0.045                   | 7.18x10 <sup>6</sup> (3.8) | 9.52x10 <sup>-12</sup> (3.5) | 8.10x10 <sup>-9</sup> (13.6) | 0.60 (2.7)      |
| 0.60±0.050                    | 4.96x10 <sup>5</sup> (4.9) | 1.13x10 <sup>-11</sup> (5.6) | 3.94x10 <sup>-8</sup> (10.5) | 0.52 (3.2)      |
| 1.58±0.065                    | 8.23x10 <sup>4</sup> (3.8) | 9.69x10 <sup>-12</sup> (5.2) | 3.99x10 <sup>-8</sup> (9.3)  | 0.61 (2.3)      |

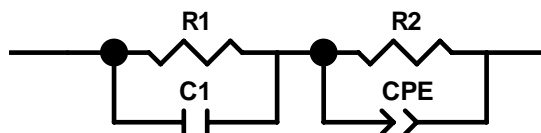

**Figure 2S.** The equivalent circuit used in analysis of EIS data presented in Figure 6.

**Table 2S.** Fit parameters determined for EIS data in Figure 6 to the equivalent circuit represented in Figure 2S.

| [Au <sup>3+</sup> ]<br>μmoles | R1<br>(% error)               | C1<br>(% error)                 | CPE-T<br>(% error)             | CPE-P<br>(% error) | R2<br>(%error)                |
|-------------------------------|-------------------------------|---------------------------------|--------------------------------|--------------------|-------------------------------|
| 1.58±0.065                    | 1.80x10 <sup>6</sup><br>(0.6) | 4.84x10 <sup>-12</sup><br>(1.3) | 2.48x10 <sup>-8</sup><br>(1.3) | 0.71<br>(0.6)      | 5.37x10 <sup>7</sup><br>(1.3) |
